1 **Parvalbumin interneurons in the nucleus accumbens regulate impairment**  
2 **of risk avoidance in *DISC1* transgenic mice**

3 Xinyi Zhou<sup>1,2, #</sup>, Bifeng Wu<sup>3, #</sup>, Qian Xiao<sup>1,2</sup>, Wei He<sup>4</sup>, Ying Zhou<sup>5</sup>, Pengfei Wei<sup>1,2</sup>, Xu Zhang<sup>6</sup>,  
4 Yue Liu<sup>2,7</sup>, Jie Wang<sup>2,7</sup>, Weidong Li<sup>6</sup>, Liping Wang<sup>1,2, \*</sup>, Jie Tu<sup>1,2, \*</sup>

5 <sup>1</sup> *Guangdong Provincial Key Laboratory of Brain Connectome and Behavior, CAS Key*  
6 *Laboratory of Brain Connectome and Manipulation, the Brain Cognition and Brain Disease*  
7 *Institute (BCBDI), Shenzhen Institutes of Advanced Technology, Chinese Academy of*  
8 *Sciences; Shenzhen-Hong Kong Institute of Brain Science-Shenzhen Fundamental Research*  
9 *Institutions, Shenzhen 518055, China*

10 <sup>2</sup> *University of Chinese of Academy of Sciences, Beijing 100049, China*

11 <sup>3</sup> *Department of information technology and electrical engineering, Zurich Swiss Federal*  
12 *Institute of Technology Zurich, Zurich 8092, Switzerland*

13 <sup>4</sup> *Virginia Polytechnic Institute and State University, Blacksburg, Virginia 24061, USA*

14 <sup>5</sup> *Department of Psychiatry and Behavioral Sciences, Emory University School of Medicine,*  
15 *Atlanta 30322, USA*

16 <sup>6</sup> *Bio-X Institutes, Key Laboratory for the Genetics of Development and Neuropsychiatric*  
17 *Disorders (Ministry of Education), Shanghai Key Laboratory of Psychotic Disorders, and Brain*  
18 *Science and Technology Research Center, Shanghai Jiao Tong University, Shanghai 200240,*  
19 *China*

20 <sup>7</sup> *Center of Brain Science, State Key Laboratory of Magnetic Resonance and Atomic and*  
21 *Molecular Physics, National Center for Magnetic Resonance in Wuhan, Key Laboratory of*  
22 *Magnetic Resonance in Biological Systems, Wuhan Institute of Physics and Mathematics,*  
23 *Innovation Academy for Precision Measurement Science and Technology, Chinese Academy*  
24 *of Sciences, Wuhan 430071, China*

25 Running title: NAc<sup>PV</sup> neurons regulates risk avoidance in *DISC1-N<sup>TM</sup>* mice

26 Word Counts: abstract; text; acknowledgments

27 Number of tables: 1

28 Number of figures: 6

1 Supplementary files: 1

2 Total text word count: 6767

3 \*Correspondence: Jie Tu, PhD, E-mail: [jie.tu@siat.ac.cn](mailto:jie.tu@siat.ac.cn),

4 Liping Wang, MD, PhD, E-mail: [lp.wang@siat.ac.cn](mailto:lp.wang@siat.ac.cn),

5 #These authors contributed equally

1 **Abstract**

2 One strong survival instinct in animals is to approach things that are of benefit  
3 and avoid risk. In humans, a large portion of mental disorders are accompanied  
4 by cognition-related impairments including the inability to recognize potential  
5 risks. One of the most important genes involved in risk behavior is disrupted-in-  
6 schizophrenia-1 (*DISC1*), and animal models where this gene has some  
7 dysfunction show cognitive impairments. However, whether *DISC1* mice  
8 models have an impairment in avoiding potential risks is still not fully  
9 understood. In the present study, we used *DISC1*-N terminal truncation (*DISC1*-  
10 *N<sup>TM</sup>*) mice to study cognitive abilities related to potential risks. We found that  
11 *DISC1-N<sup>TM</sup>* mice were impaired in risk avoidance on the elevated plus maze  
12 (EPM) test, and showed impairment in social preference in a three-chamber  
13 social interaction test. Staining for c-Fos following the EPM indicated that the  
14 nucleus accumbens (NAc) was associated with risk avoidance behavior in  
15 *DISC1-N<sup>TM</sup>* mice. Meanwhile, *in vivo* electrophysiological recordings showed  
16 that firing rates of fast spiking neurons (FS) in the NAc significantly decreased  
17 in *DISC1-N<sup>TM</sup>* mice following tamoxifen administration. In addition, theta band  
18 power was lower when mice shuttled from the safe (closed) arms to the risky  
19 (open) arms, an effect which disappeared after induction of the truncated  
20 *DISC1* gene. Furthermore, we found through *in vitro* patch clamp recording that  
21 the frequency of action potentials stimulated by current injection was lower in  
22 parvalbumin (PV) neurons in the NAc of *DISC1-N<sup>TM</sup>* mice than their wild-type  
23 littermates. Risk-avoidance impairments in *DISC1-N<sup>TM</sup>* mice were rescued  
24 using optogenetic tools that activated NAc<sup>PV</sup> neurons. Finally, we inhibited  
25 activity of NAc<sup>PV</sup> neurons in PV-Cre mice, which mimicked the risk-avoidance

1 impairment found in the *DISC1-N<sup>TM</sup>* mice during tests on the elevated zero  
2 maze. Taken together, our findings confirmed a cognitive impairment in *DISC1-*  
3 *N<sup>TM</sup>* mice related to risk recognition and suggests that reduced excitability of  
4 NAc<sup>PV</sup> neurons may be responsible.

5 **Keywords**

6 *DISC1* · risk avoidance · cognitive impairment · PV · nucleus accumbens (NAc)

## 1 **Introduction**

2 Many patients with mental disorders are accompanied by varying levels of  
3 cognitive deficiency, which can influence psychosocial outcomes and raise the  
4 probability of having an accident [1]. The study of an extended Scottish family  
5 in which a balanced (1; 11) (q42.1;q14.3) chromosomal translocation was found  
6 to co-segregate with mental illness led the way to the identification of the *DISC1*  
7 gene [2]. The *DISC1* gene is now perhaps the most well-known risk genes used  
8 to study the pathophysiology of major mental disorders, such as schizophrenia,  
9 bipolar disorder, and major depressive disorder (MDD) [3]. Many transgenic  
10 rodent models have been generated to manipulate the function of *DISC1* gene  
11 [4-6]. Many studies have shown that *DISC1* transgenic rodents show abnormal  
12 cognitive function, including object recognition memory deficits, working  
13 memory deficits, and social recognition deficits [7, 8]. These cognitive deficits  
14 are consistent with those found in human patients with mental disorders [9-11].

15 Another important cognitive ability is the evaluation of risk and reward, which  
16 is essential for survival, and as such, risk avoidance is a behavior conserved  
17 across species [12-14]. Although both genetic and functional studies provide  
18 evidence to support a critical role of *DISC1* in risk recognition, the underlying  
19 neuronal mechanism has not yet been discovered. We do know that abnormal  
20 development and impaired PV interneuron function have been found in mice  
21 with *DISC1* truncation [15, 16]. Previous work from our group has suggested  
22 that activity of NAc<sup>PV</sup> neurons are required for anxiety-like behavior [17].  
23 However, whether NAc<sup>PV</sup> neuronal activity is also involved in risk cognition and  
24 avoidance has not been determined.

25 In the present study, we addressed these questions using a combination of

1 *DISC1* truncation transgenic mice, opto/chemogenetic manipulations, *in vivo*  
2 recordings and behavioral analyses to examine whether the cognitive  
3 deficiency phenotype in *DISC1-N<sup>TM</sup>* mice encompasses impairment of risk  
4 recognition and also to investigate the underlying neuronal mechanisms.

## 5 **Materials and Methods**

### 6 **Animals**

7 We used the following mouse lines: PV-Cre mice (B6; 129P2-Pvalbtm1 (cre)  
8 Arbr/J, Jackson Laboratory, stock No.008069), VGAT-ChR2-EYFP (B6.Cg-Tg  
9 (Slc32a1-COP4\*H134R/EYFP) 8Gfng/J, Jackson Laboratory, stock No.  
10 014548), inducible *DISC1-N* terminal fragment transgenic mice (*DISC1-N<sup>TM</sup>*,  
11 from Prof. Weidong Li, Shanghai Jiao Tong University) and C57BL/6J mice  
12 (Guangdong Medical Laboratory Animal Center, Guangzhou, China). Mice  
13 were given free access to food pellets and water and maintained on a 12h/12h  
14 light/dark cycle (lights on at 8:00 a.m.). All experiments were approved by the  
15 Shenzhen Institutes of Advanced Technology, Chinese Academy of Sciences  
16 Research Committee, and all experimental procedures involving animals were  
17 carried out in strict accordance with the Research Committee's animal use  
18 guidelines. Surgeries were performed under full anesthesia and every effort  
19 was made to minimize animal suffering.

### 20 **Behavior tests**

21 All behavioral tests were performed blind to mice genotype. Groups of mice  
22 were age-matched (8-16 weeks) and, prior to behavioral assays, were handled  
23 for 5 min per day for three days to reduce stress introduced by experimenter

1 contact. *DISC1-N<sup>TM</sup>* mice were given tamoxifen (Sigma-Aldrich, #T5648)  
2 (intraperitoneal injection, 5X10<sup>-5</sup>g/g) two hours before behavioral testing and  
3 finished testing within 6 hours. Behavioral tests using CNO (MedChemExpress,  
4 #HY-17366) were conducted in a 60-min window that began 30 min after CNO  
5 administration (intraperitoneal injection, 1mg/kg). All behavioral tests were  
6 recorded by a video camera directly above and videos were analyzed using  
7 ANY-maze (Stoelting, U.S.A).

### 8 **1) Elevated plus maze test (EPM)**

9 A plastic elevated plus maze consisting of a central platform (5×5 cm) with  
10 two white open arms (25×5 cm) and two white closed arms (25×5 cm, with 17-  
11 cm-high surrounding walls) extending from it in a plus shape was used. The  
12 maze was elevated 58 cm above the floor. Mice were placed in the central area  
13 of the EPM with their heads facing an open arm and were allowed to freely  
14 explore for 5 min. The number of entries and the amount of time spent in each  
15 arm type were recorded.

### 16 **2) Elevated zero maze test**

17 A plastic elevated zero maze consisting of an elevated annular platform  
18 (external diameter: 50 cm, width: 5 cm) with two opposite, enclosed quadrants  
19 (height: 15 cm) and two open quadrants was used. The maze was elevated 80  
20 cm above the floor. Mice were placed on the platform with their heads facing  
21 one closed arm and behavior was recorded for 5 min. Similar to the EPM, the  
22 number of entries and the amount of time spent in each arm type were recorded.

### 23 **3) Three-chamber social interaction test**

24 A three-chambered apparatus (60×40×25 cm) with a central chamber (20-

1 cm wide) and two side chambers (each 20-cm wide) was used. An empty  
2 housing cage was put inside each side chamber and the test mouse was placed  
3 in the central chamber and allowed to freely explore the three chambers for a  
4 5 min habituation period. Then, in a second phase, the mouse was gently put  
5 back to the central chamber and the two side-chamber entrances were blocked  
6 and then a 'stranger' mouse was placed in one side chamber. Both entrances  
7 were then opened to allow the test mouse to explore the new environment freely  
8 for 10 min. The time spent in each chamber was recorded. All stranger mice  
9 were of the same age and gender.

#### 10 **Stereotactic virus injection and optogenetic manipulation**

11 Adeno-associated viruses (AAVs) carrying Cre-inducible transgenes (AAV-  
12 DIO-ChR2-mCherry, titers  $3 \times 10^{12}$  particles per ml, AAV-DIO-hM4Di-mCherry,  
13 titers  $3 \times 10^{12}$  particles per ml, AAV-DIO-mCherry, titers  $3 \times 10^{12}$  particles per ml)  
14 were packaged in our laboratory. Mice were deeply anesthetized with 1%  
15 sodium pentobarbital (Sigma-Aldrich, #P3761, 10 ml/kg body weight, i.p.) and  
16 placed in a stereotaxic instrument (RWD Life Science Inc., Shenzhen, China)  
17 and head fixed. A microinjector pump (UMP3/Micro4, USA) was used through  
18 a microliter syringe (10  $\mu$ l, Hamilton) to inject virus to the target region at a  
19 speed of 80 nl/min. The needle was left in place for 10 min after finishing  
20 injection to avoid reflux of the viral solution. A volume of 200 nl of AAV-DIO-  
21 ChR2-mCherry was unilateral injected at NAc (AP +1.12 mm, ML +1.50 mm,  
22 DV -4.85 mm) for optogenetic and electrophysiological experiments. Similarly,  
23 200 nl of AAV-DIO-hM4Di-mCherry was bilateral injected at NAc (AP +1.12 mm,  
24 ML  $\pm$ 1.50 mm, DV -4.85 mm) for designer receptors exclusively activated by a  
25 designer drug (DREADD) experiments. For optogenetic experiments, 2 weeks



1 after virus injection, mice were implanted with a 200  $\mu\text{m}$  unilateral fiber optic  
2 cannula (AP +1.12 mm, ML +1.50 mm, DV -4.65 mm) secured to the skull with  
3 denture base material (SND, China) and dental base acrylic resin powder  
4 (Feiying, China). The mice were then given 1-week recovery before behavior  
5 experiments began. A control (mCherry) group underwent the same procedure  
6 and received the same intensity of laser stimulation.

### 7 **Immunohistochemistry**

8 Mice received an overdose of 1% sodium pentobarbital (15 ml/kg body  
9 weight, i.p.) and were transcardially perfused with phosphate-buffered saline  
10 (PBS), followed by 4% paraformaldehyde (PFA; Aladdin, #C104188) in PBS.  
11 Brains were removed and submerged in 4% PFA at 4 °C overnight to post-fix,  
12 and then transferred to 20% sucrose for one day and then 30% sucrose for 2  
13 days. Coronal brains sections (30  $\mu\text{m}$ ) were obtained on a cryostat microtome  
14 (Lecia CM1950, Germany). Brain sections were washed with PBS (3 min, room  
15 temperature) 3 times to wash out OCT. Then, brain sections were put into  
16 blocking solution (0.3% Triton X-100 and 10% normal goat serum, NGS in PBS,  
17 1 h at room temperature). Brain sections were then incubated in primary  
18 antiserum (rabbit anti-c-Fos, 1:300, Cell Signaling; rabbit anti-PV, 1:300, Abcam;  
19 mouse anti-HA-tag, 1:300, proteintech) diluted in PBS with 3% NGS and 0.1%  
20 Triton X-100 overnight. The following day, the sections were incubated in  
21 secondary antibodies at room temperature for 1 h. The secondary antibodies  
22 used were Alexa Fluor<sup>®</sup> 488 or 594-conjugated goat anti-rabbit or anti-mouse  
23 IgG antibodies (1:300, Invitrogen, CA, USA) at room temperature for 1 h. Then  
24 brain sections were mounted and covered slipped with anti-fade reagent with

1 DAPI (ProLong Gold Antifade Reagent with DAPI, life technologies). Brain  
2 sections were then photographed and analyzed with an Olympus slide scanner  
3 VS120-S6-W or Leica TCS SP5 laser scanning confocal microscope. Images  
4 were taken and c-Fos staining was manually counted by two individual  
5 experimenters blind to the experiment groups. The Mouse Brain in Stereotaxic  
6 Coordinates was used to locate brain areas. For c-Fos staining following  
7 behavioral tests, mice were sacrificed 1.5 hr post EPM stimulus and brains then  
8 subjected to c-Fos staining. For c-Fos staining without behavioral tests, mice  
9 were sacrificed directly after moving from homecage.

#### 10 **Patch-clamp electrophysiology**

11 For patch clamp recording, all drugs used were from Sigma-Aldrich unless  
12 indicated otherwise. Coronal slices (300  $\mu\text{m}$ ) containing NAc shell (bregma 1.7  
13 to 0.6 mm) were prepared from mice using standard procedures. Brains were  
14 quickly removed and chilled in ice-cold modified artificial cerebrospinal fluid  
15 (ACSF) containing (in mM): 110 Choline Chloride, 2.5 KCl, 1.3  $\text{NaH}_2\text{PO}_4$ , 25  
16  $\text{NaHCO}_3$ , 1.3 Na-Ascorbate, 0.6 Na-Pyruvate, 10 Glucose, 2  $\text{CaCl}_2$ , 1.3  $\text{MgCl}_2$ .  
17 Then the NAc slices were cut in ice-cold modified ACSF using a Leica  
18 vibroslicer (VT-1200S). Slices were allowed to recover for 30 min in a storage  
19 chamber containing regular ACSF at 32~34  $^\circ\text{C}$  (in mM): 125 NaCl, 2.5 KCl, 1.3  
20  $\text{NaH}_2\text{PO}_4$ , 25 $\text{NaHCO}_3$ , 1.3 Na-Ascorbate, 0.6 Na-Pyruvate, 10 Glucose, 2  
21  $\text{CaCl}_2$ , 1.3  $\text{MgCl}_2$  (pH 7.3~7.4 when saturated with 95%  $\text{O}_2$ /5%  $\text{CO}_2$ ), and  
22 thereafter kept at room temperature, until placed in the recording chamber. The  
23 osmolarity of all the solutions was 300~320 mOsm/kg. For all  
24 electrophysiological experiments, slices were viewed using infrared optics  
25 under an upright microscope (Eclipse FN1, Nikon Instruments). The recording

1 chamber was continuously perfused with oxygenated ACSF (2 ml/min) at room  
2 temperature. Pipettes were pulled by a micropipette puller (Sutter P-2000  
3 Micropipette Puller) with a resistance of 5-10 M $\Omega$ . Recordings were made with  
4 electrodes filled with intracellular solution (in mM): 130 potassium gluconate, 1  
5 EGTA, 10 NaCl, 10 HEPES, 2 MgCl<sub>2</sub>, 0.133 CaCl<sub>2</sub>, 3.5 Mg-ATP, 1 Na-GTP.  
6 Action potential firing frequency was analyzed in current-clamp mode in  
7 response to a 2 s depolarizing current step. All recordings were conducted with  
8 a MultiClamp700B amplifier (Molecular Devices). Currents were low-pass  
9 filtered at 2 kHz and digitized at 20 kHz using an Axon Digidata 1440A data  
10 acquisition system and pClamp 10 software (both from Molecular Devices).  
11 Series resistance (R<sub>s</sub>) was 10~30 M $\Omega$  and regularly monitored throughout the  
12 recordings. Data were discarded if R<sub>s</sub> changed by >30% over the course of  
13 data acquisition.

#### 14 **In vivo single-unit and local field potential (LFP) recordings in the NAc** 15 **shell of *DISC1-N<sup>TM</sup>* mice**

16 Microdrive tetrodes were constructed using platinum-iridium wire (12 $\mu$ m,  
17 California Fine Wire Co.). Eight tetrodes were arranged into a 4x2 array and  
18 attached to a microdrive such that the tetrodes could be driven towards a  
19 desired location. The impedance of the electrodes was reduced to around 0.5  
20 M $\Omega$  by platinum electroplating.

21 *DISC1-N<sup>TM</sup>* mice (aged 8-12 weeks) were anesthetized with sodium  
22 pentobarbital (70 mg/kg i.p.). Body temperature was maintained at 37 °C with  
23 a heating pad placed under the mouse. The head of the mouse was secured

1 and leveled in both the anterior-posterior and the middle-lateral axis on a  
2 stereotaxic apparatus. A microdrive electrode was attached to a  
3 micromanipulator and the electrodes were inserted gradually into the medial  
4 part of the NAc. The tetrode tips were ultimately aimed at the following  
5 coordinates: AP1.12 mm, ML1.50 mm, and DV-4.65 mm but were left 400  $\mu$ m  
6 above the required depth during the surgery. The microdrive and connector  
7 were secured on the skull using dental cement. Mice were allowed to recover  
8 for at least one week after implantation.

9 *In vivo* extracellular signals were monitored and acquired using a 64-channel  
10 Multichannel Acquisition Processor (Plexon Inc, Dallas, TX) with a headstage  
11 amplifier (Plexon Inc, HST/32V-G20). Wideband signals were recorded at 40  
12 kHz. Local field potential (LFP) signals were filtered at 0-200 Hz by a low-pass  
13 Bessel filter and downsampled to 1 kHz.

14 Prior to *in vivo* recording sessions, mice were habituated to the recording set-  
15 up with two daily 20-min sessions in their home cages where their microdrives  
16 were tethered to the recording cables in order to habituate to the plugging in/out  
17 process and to the overhead cable movements. Electrodes were gradually  
18 advanced to the desired depth and *in vivo* recordings were acquired when well-  
19 isolated single units were detected and were stable for at least 2 hours. Mice  
20 were allowed to freely explore the EPM for 5 min before and 6 hours after  
21 tamoxifen injection. Behavioral activity was recorded by a camera directly  
22 above and synchronized with neural data acquisition. After *in vivo* recording,

1 recording sites were marked with electrolytic lesions and animals were deeply  
2 anesthetized with 10% chloral hydrate (0.4mg/kg) and transcardially perfused  
3 with PBS, followed by 4% paraformaldehyde (PFA) (wt/vol). Brains were  
4 dissected and post fixed at 4 °C in 4% PFA overnight. Frozen sections of the  
5 whole area were cut into 40- $\mu$ m thick slices and the recording locations were  
6 reconstructed.

7

### 8 **Single-unit spike sorting and analysis**

9 Mouse locomotion was analyzed and moving trajectories were reconstructed  
10 using an automatic video tracking system (AnyMaze). An offline sorter (Plexon)  
11 was used for spike detecting and spike sorting. Continuous wideband signals  
12 were high-pass filtered (300 Hz) with a Bessel filter, then a threshold (- 4.5 s.d.)  
13 was applied for spike detection. A spike waveform window was set as 1400  $\mu$ s  
14 including 300  $\mu$ s before threshold crossing. Single units were sorted based on  
15 waveform features in three-dimensional principal component space. To quantify  
16 recording stability before and after tamoxifen injection, we calculated the  
17 correlation coefficient between the average waveforms of single units in the pre-  
18 injection session and post-injection session. Only cells exhibiting r values >  
19 0.90 between the two sessions were recognized as the same cell and reserved  
20 for further analysis [18]. Single units in the NAc were classified into fast-spiking  
21 neurons and non-fast-spiking neurons utilizing an unsupervised clustering  
22 method using peak-to-peak width and averaged firing rate [19-21]. Burst

1 number was calculated for each single unit where a burst was defined as  
2 composing at least 5 spikes with inter-spike interval (ISI) of 6 ms [22]. To  
3 compare firing rate changes before and after tamoxifen injection, the firing rate  
4 of each single unit was calculated in five successive bins (10 s per bin). Firing  
5 rate was recognized as undergoing a significant change when the P-value of  
6 the rank sum test was less than 0.05. The multitaper method [23] in the  
7 Chronux analysis package (<http://chronux.org/>) was used for spectral analysis  
8 to estimate spectral power, time frequency and coherence analysis. The value  
9 was calculated using a 1 s window with 3 time-bandwidth product (NW) and 5  
10 tapers. The coherence value in the theta band (4-8 Hz) that exceeded the 95%  
11 confidence level was used for analysis. The coherence value was normalized  
12 by dividing by the max value in the theta band. Statistical analysis of coherence  
13 was conducted on the original values.

14

## 15 **Results**

### 16 ***DISC1-N<sup>TM</sup>* mice have impaired risk-avoidance behavior**

17 The *DISC1* transgenic mouse strain used was an N-terminal fragment  
18 isoform under a *Camk2a* promoter (Figure 1A). To check the expression of the  
19 inserted gene, the HA-tag was co-stained with DNA-specific fluorescent  
20 Hoechst 33258 in three typical brain areas: the cortex, the hippocampus and  
21 the NAc (Figure 1B). This revealed that the *DISC1-N* truncation was widely  
22 expressed in the transgenic mice.

23 We next asked if expression of the N-terminal fragment isoform of the *DISC1*

1 gene affected behavior related to risk recognition in the elevated plus maze  
2 (EPM). After tamoxifen administration (i.p.), *DISC1-N<sup>TM</sup>* mice spent significantly  
3 more time in the open arms and made more entries to the open arms compared  
4 to control groups including wild type with tamoxifen mice (WT+tamo), wild type  
5 with vehicle mice (WT+oil) and *DISC1* mice with vehicle (*DISC1*+oil) (Figure  
6 1C, D). There were no significant differences between the four groups in mean  
7 speed (Figure 1E). Furthermore, there was no difference between the  
8 *DISC1*+tamo and WT+tamo groups in velocity in the open or closed arms, total  
9 distance traveled, or time spent in the center ( $P > 0.05$ ; Table 1). Therefore, the  
10 difference in residence time and number of entries to the open arms were  
11 unlikely to have been confounded by changes in locomotion or by  
12 intraperitoneal administration. These results suggest that the expression of the  
13 N-terminal fragment isoform of the *DISC1* gene influenced cognition of risk in  
14 the EPM test.

15 Because some *DISC1* mutant mice also show cognitive defects in social-  
16 related behavior [24], we used a three-chamber social interaction test to  
17 determine sociability in *DISC1-N<sup>TM</sup>* mice. Mice normally prefer to spend more  
18 time with other mice [25]; however, following tamoxifen injections, *DISC1-N<sup>TM</sup>*  
19 mice spent less time with a stranger mouse than did the WT+tamo control group  
20 (Figure 1G). Low interaction time with the stranger mouse indicates that *DISC1*-  
21 *N<sup>TM</sup>* mice had a social preference impairment.

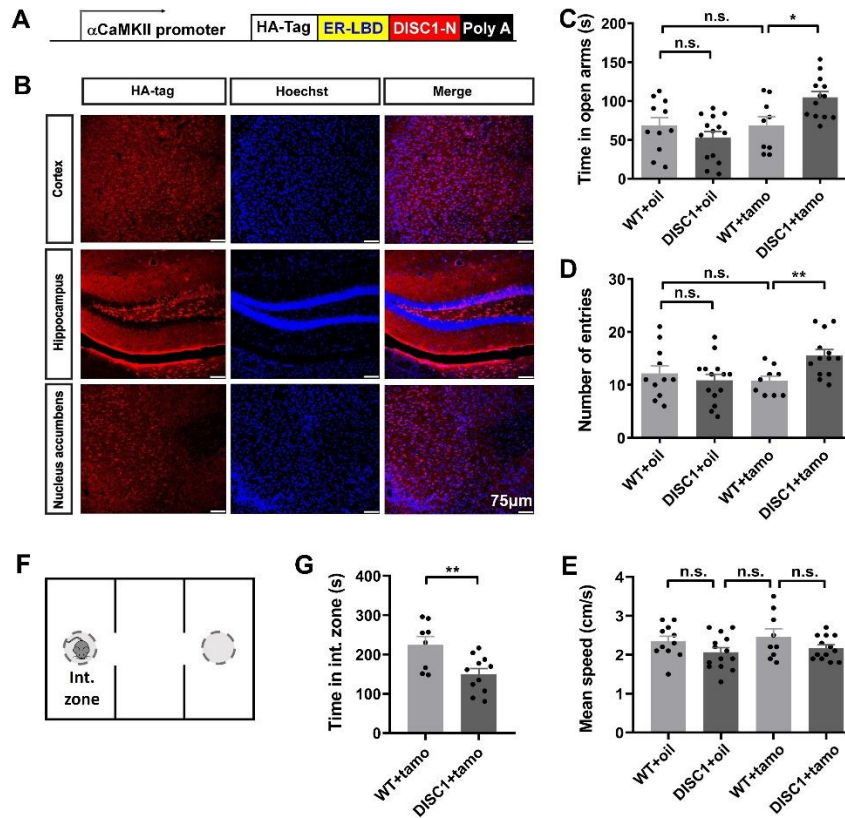

1

2 **Figure 1. *DISC1-N<sup>TM</sup>* mice are impaired in risk avoidance.**

3 A. Schematic showing the inserted expressed sequence in *DISC1-N<sup>TM</sup>* mice. B.

4 Staining for HA-tag (red) and hoechst 33258 (blue) in the cortex, hippocampus

5 and NAc of *DISC1-N<sup>TM</sup>* mice. C-E. Time spent in the open arms (C), number of

6 entries to the open arms (D) and mean speed (E) during the EPM test (unpaired

7 t-test, \**P* =0.0105, \*\**P* =0.0058; n=11, 14, 9 and 13 from left to right). F.

8 Schematic for three-chamber social interaction task. G. Time spent in the

9 interaction zone during the three-chamber social interaction task (unpaired t-

10 test, \*\**P* =0.0077; n=8 and 11 from left to right).

11



|                                | WT+tamo        | DISC1+tamo      |
|--------------------------------|----------------|-----------------|
| Entries into closed arms       | 16.44 ± 1.709  | 14.54 ± 1.352   |
| Time spent in closed arms (s)  | 162.3 ± 9.797  | 124.8 ± 6.681** |
| Velocity in closed arms (cm/s) | 2.976 ± 0.2407 | 2.791 ± 0.1366  |
| Entries into open arms         | 10.78 ± 0.8941 | 15.54 ± 1.119** |
| Time spent in open arms (s)    | 68.53 ± 11.20  | 104.9 ± 7.416 * |
| Velocity in open arms (cm/s)   | 2.001 ± 0.2575 | 1.962 ± 0.09793 |
| Total distance traveled (m)    | 7.419 ± 0.5981 | 6.527 ± 0.2433  |
| Time spent in center (s)       | 71.21 ± 5.819  | 70.38 ± 5.791   |

1

2 **Table 1.** Results of elevated plus-maze test. Values are presented as  
3 mean ± SEM (\**P* = 0.0105, \*\**P* = 0.0037 and 0.0058 from top to bottom).

4

5 **The NAc may play a role in the abnormal risk-avoidance behavior seen in**  
6 ***DISC1-N<sup>TM</sup>* mice, as illustrated by c-Fos staining**

7 After confirming cognitive impairment in risk avoidance in *DISC1-N<sup>TM</sup>* mice,  
8 we investigated which brain area is involved in abnormal risk-avoidance  
9 behavior in *DISC1-N<sup>TM</sup>* mice. We performed c-Fos staining following an EPM  
10 test in eight cognition-related or emotion-related brain areas: the medial  
11 prefrontal cortex (mPFC), NAc, bed nucleus of the stria terminalis (BNST),  
12 hippocampus, lateral hypothalamic (LH), basolateral amygdala (BLA),  
13 paraventricular nucleus of the thalamus (PVT) and the ventral tegmental area  
14 (VTA). We found that c-Fos expression in the NAc, BLA, PVT and VTA was  
15 significantly elevated in *DISC1-N<sup>TM</sup>* mice compared to WT mice (Figure 2A).  
16 Our previous work showed that neurons in the NAc can control behavioral  
17 states and regulate mouse performance on the EPM [17]. Moreover, the NAc  
18 is considered to be an interface between cognition and emotion [26]. Thus, we  
19 hypothesized that the NAc may play a role in abnormal risk-avoidance behavior

1 in *DISC1-N<sup>TM</sup>* mice.

2 To control for differences due to mouse strain, we also performed c-Fos  
3 staining on the brains of homecage-only mice and found that the differences  
4 between WT mice and *DISC1-N<sup>TM</sup>* mice diminished (Figure 2C). This strongly  
5 suggests that the elevated c-Fos expression in the NAc was due to the effects  
6 of the EPM. In addition, c-Fos expression was lower in homecage mice than  
7 mice in the EPM experiment (both in *DISC1-N<sup>TM</sup>* mice and WT mice, data not  
8 shown).

### 9 ***In vivo* electrophysiological recordings show reduced firing rate in FS** 10 **neurons after tamoxifen injection**

11 To further investigate which cell-types in the NAc may participate in risk-  
12 avoidance impairment in *DISC1-N<sup>TM</sup>* mice, we conducted *in vivo* single-cell  
13 recording in the NAc before and after *DISC1-N<sup>TM</sup>* mice were given tamoxifen.  
14 Distinct sub-types of NAc neurons were classified based on their major  
15 electrophysiological properties [19, 27]. Of 61 recorded NAc units in the *DISC1-*  
16 *N<sup>TM</sup>* mice, neurons were classified as putative FS neurons and putative non-  
17 fast spiking (Non-FS) neurons according to firing rate and peak-to-peak width  
18 (Fig. 2D). Nine units were identified as putative FS neurons and 52 units were  
19 identified as Non-FS neurons. The firing rate and burst numbers of the putative  
20 FS neurons and the Non-FS neurons were significantly different (Fig.2E, F),  
21 which indicates that they were indeed two different classes of neuron as  
22 described previously [19]. The average firing rates of the FS neurons decreased  
23 and there was a significant difference before and after tamoxifen injection (Fig.  
24 2G). For the Non-FS neurons, firing rates were not different before and after  
25 tamoxifen injection (Fig. 2H). In summary, *in vivo* single-cell recordings show

- 1 that the firing rates of NAc-FS neurons show decreased after tamoxifen
- 2 injection in *DISC1-N<sup>TM</sup>* mice.

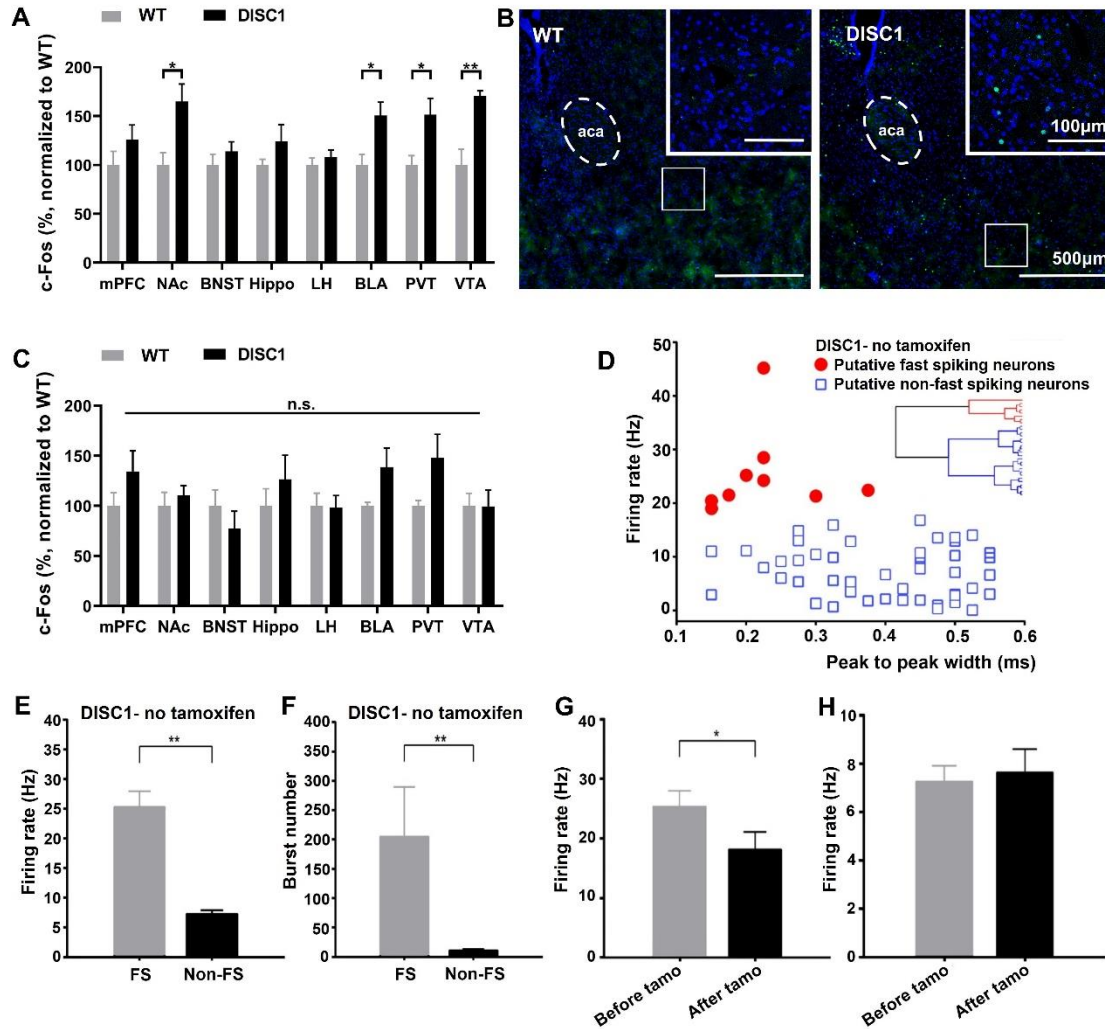

3

4 **Figure 2. *In vivo* electrophysiological recordings in the NAc shell of**

5 ***DISC1-N<sup>TM</sup>* with or without tamoxifen induction.**

6 A. Comparison of c-Fos expression in WT and *DISC1-N<sup>TM</sup>* mice following

7 EPM test (unpaired t-test, \**P* = 0.0138, 0.0152 and 0.0247 from left to right,

8 \*\**P* = 0.0019; *n* = 3 for each group). B. Representative staining for c-Fos

9 expression after EPM task in the NAc. C. Comparison of c-Fos expression in

10 WT and *DISC1-N<sup>TM</sup>* homegene controls (*n* = 3, each group). D. Scatter plot

1 showing the firing rate and peak-to-peak width for 61 units from 21 *DISC1-N<sup>TM</sup>*  
2 mice. E, F. Firing rate (E) and burst numbers (F) of putative fast spiking (FS)  
3 neurons and putative non-fast spiking neurons (Non-FS) (unpaired t-test, \*\*  
4  $P = 0.001$ ). G. Firing rates of FS before and after tamoxifen injection (paired t-  
5 test,  $n = 9$ , \*  $P < 0.05$ ). H. Firing rates of Non-FS neurons before and after  
6 tamoxifen injection (paired t-test,  $n = 52$ ,  $P = 0.963$ ). Data are presented as  
7 mean  $\pm$  SEM.

8

9 **NAc theta power undergoes no discriminative changes correlated with**  
10 **the location on the EPM in *DISC1-N<sup>TM</sup>* mice**

11 Theta oscillation plays a role in cognitive behavior [28] and is correlated with  
12 cognitive impairments [29, 30]. We investigated local NAc LFP in *DISC1-N<sup>TM</sup>*  
13 mice to see how theta oscillation changes during an EPM test. Before tamoxifen  
14 injection, theta (4-8 Hz) power was significantly lower on the open arms than  
15 that on the closed arms (Fig. 3A), which is consistent with our previously  
16 reported findings in wild-type mice [17]. However, after tamoxifen injection, LFP  
17 power in the theta band was not predictive of whether the *DISC1-N<sup>TM</sup>* mice were  
18 on the open arms or closed arms (Fig. 3B). A representative time-frequency  
19 map (Fig. 3C) also confirmed that theta power in *DISC1-N<sup>TM</sup>* mice was  
20 significantly reduced when traversing from the closed arms to open arms before  
21 tamoxifen injection, but after tamoxifen induction, theta power did not show a  
22 reduction between arms.

23 We then investigated coherence between spikes and LFP power. Coherence  
24 between FS neuron spikes and theta power was significantly lower in the

1 *DISC1-N<sup>TM</sup>* mice (Fig. 3D). Conversely, for Non-FS neurons, there were no  
2 significant changes in coherence between spikes and theta power before or  
3 after tamoxifen injection (Fig. 3E). These data indicate that activity of NAc-FS  
4 neurons is strongly correlated with decrease of local theta power during  
5 exploration of the risky open arm. Taken together, these *in vivo* results indicate  
6 that theta power in the NAc was lower in the risky open arms and was correlated  
7 with the firing rate of NAc-FS neurons, while these phenomena were abolished  
8 by the induced expression of the N-terminal fragment isoform of *DISC1* gene.  
9 The firing rate of NAc-FS neurons was also lower after tamoxifen injection in  
10 the *DISC1-N<sup>TM</sup>* mice (Fig. 2G), suggesting that NAc-FS neurons may be  
11 involved in abnormal risk avoidance behavior in *DISC1-N<sup>TM</sup>* mice. One FS  
12 neuron type, PV interneurons, mediate theta oscillation in cortical networks [31].  
13 What's more, our previous work has shown that PV interneurons in the NAc  
14 regulate the performance of chronically stressed mice in the EPM [17]. Thus,  
15 we propose that PV interneurons in the NAc are response for the abnormal risk  
16 avoidance behavior of *DISC1-N<sup>TM</sup>* mice.

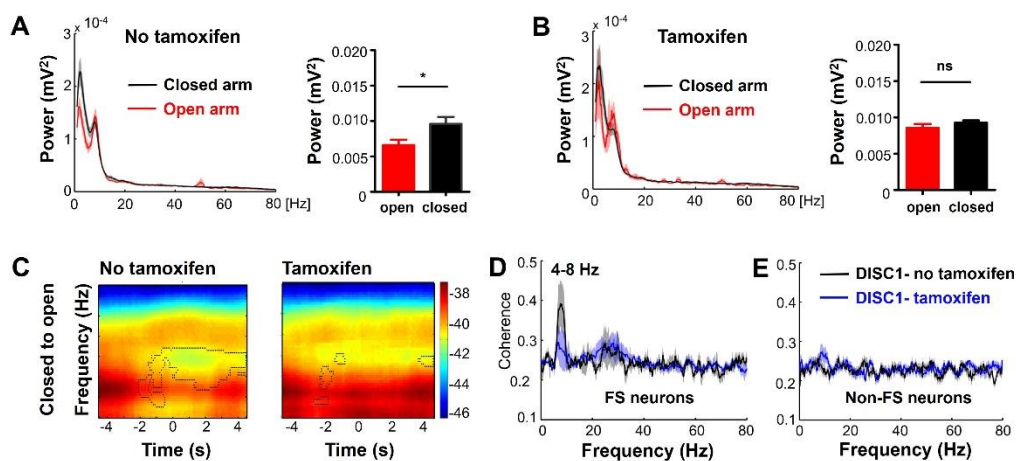

17

18 **Fig 3. Accumbal LFP recordings in *DISC1-N<sup>TM</sup>* mice with or without**

19 **tamoxifen induction.**

1 A. Changes in theta power during periods of traversing between different EPM  
2 arms types before tamoxifen induction (Paired *t*-test, n of experiments = 17, *t*  
3 = 2.192 with 16 degrees of freedom, \**P* = 0.044). B. No change in theta power  
4 during periods of traversing between different EPM arms types after tamoxifen  
5 induction (Paired *t*-test, n of experiments = 17, *t* = 0.119 with 16 degrees of  
6 freedom, *P* = 0.907). C. Example spectrograms showing the changes in LFP  
7 during animals traversing from the closed to open arms before and after  
8 tamoxifen injection in *DISC1-N<sup>TM</sup>* mice. D. Difference in spike and LFP  
9 coherence of PV-FS neurons in *DISC1-N<sup>TM</sup>* mice before and after tamoxifen  
10 injection (Wilcoxon rank-sum test, n = 4, *W* = -10, Z-Statistic = -1.826, *P*  
11 = 0.0125). E. Difference in spike and LFP coherence in Non-FS neurons in  
12 *DISC1-N<sup>TM</sup>* mice before and after tamoxifen injection (Paired *t*-test, n = 13, *t* =  
13 0.713 with 12 degrees of freedom, *P* = 0.488).

14

### 15 **PV neurons in the NAc show less excitability in *DISC1-N<sup>TM</sup>* mice**

16 To further explore PV function in *DISC1-N<sup>TM</sup>* mice, we investigated the  
17 electrophysiological characteristics of NAc<sup>PV</sup> neurons using the whole-cell  
18 patch clamp recordings. We used *PV-Cre* and *DISC1-N* truncation double  
19 transgenic mice and stereotaxically injected AAV-DIO-ChR2-mCherry into the  
20 NAc area. A *PV-Cre* mice control group was stereotaxically injected with AAV-  
21 DIO-ChR2-mCherry into the NAc area. After waiting 3-4 weeks for the virus to  
22 fully express, we prepared acute brain slices and recorded PV neurons under

1 the current clamp model. Fluorescent mCherry, carried by the virus, enabled  
2 identification of PV neurons under the microscope (Figure 4B).

3 We gave different step-current stimulation to the PV neurons using 100 pA,  
4 150 pA and 200 pA. Only 200 pA current stimulation was able to induce stable  
5 action potentials (AP) in all PV neurons. So, we compared firing rates of the  
6 control and *DISC1-N<sup>TM</sup>* groups under 200 pA current stimulation and found that  
7 PV neurons in *DISC1-N<sup>TM</sup>* mice had significantly lower firing rate than PV-Cre  
8 control group (Figure 4C, E). This result indicates that NAc<sup>PV</sup> neurons were less  
9 excitable than in *DISC1-N<sup>TM</sup>* mice than in control mice and that they may be  
10 responsible for risk-avoidance behavior impairment in *DISC1-N<sup>TM</sup>* mice.  
11 Resting membrane potential (Figure 4D), amplitude and half-wave width of APs  
12 evoked by a 200 pA current (Figure 4F, G) were not different between NAc<sup>PV</sup>  
13 neurons of *DISC1-N<sup>TM</sup>* and PV-Cre control mice.

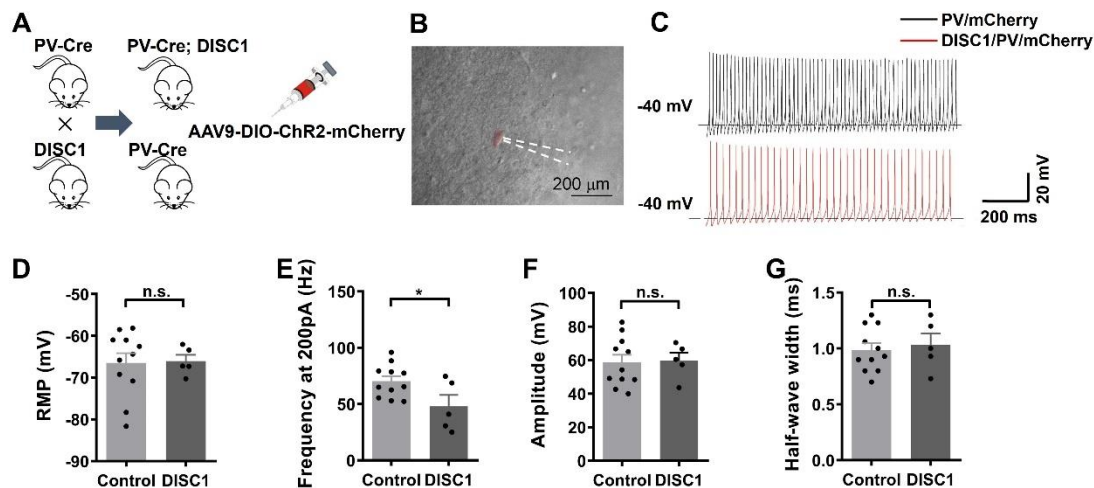

14

15 **Figure 4. Recordings in acute brain slices from PV-Cre/*DISC1-N<sup>TM</sup>* and**

16 **PV-Cre mice.**



1 A. Schematic showing transgenic mice used. B. Representative photograph  
2 showing patch recording on a PV neuron. C. Representative plot showing  
3 action potentials stimulated by 200 pA current. D. Resting membrane potential  
4 of PV neurons (n=11 left, n=5 right). E-G. Frequency (E), amplitude (F) and  
5 half-wave width (G) of action potentials when giving 200 pA current  
6 stimulation (\* $P=0.0308$ , n=11 left, n=5 right).

7

### 8 **Optogenetic activation of PV neurons in the NAc rescues risk avoidance** 9 **impairment in *DISC1-N<sup>TM</sup>* mice**

10 The results above indicate that NAc<sup>PV</sup> neurons are dysfunctional in *DISC1-*  
11 *N<sup>TM</sup>* mice. Next, we tested whether modulation of PV neurons in the NAc could  
12 rescue the risk-avoidance impairments in *DISC1-N<sup>TM</sup>* mice. We selectively  
13 activated NAc<sup>PV</sup> neurons by delivering blue light (5 ms per pulse, 60 Hz) in PV-  
14 Cre and *DISC1-N* truncation double transgenic mice unilaterally infected in the  
15 NAc with AAV-DIO-ChR2-mCherry (Figure 5A, B). PV-Cre mice unilaterally  
16 infected in the NAc with AAV-DIO-mCherry or AAV-DIO-ChR2-mCherry were  
17 also used as control groups (Figure 5A). The function of ChR2-expressing PV  
18 neurons had been checked by whole-cell patch clamp in brain slice containing  
19 the NAc area from PV-Cre mice (Figure 5C, D). During blue light stimulation,  
20 *DISC1-N<sup>TM</sup>* mice not only spent significantly less time in the open arms but also  
21 had lower entry numbers to the open arms compared with the light-off phase  
22 (Figure 5E, F). Furthermore, in the light-on phase, ChR2-expressing *DISC1-*  
23 *N<sup>TM</sup>* mice were not different from the non-ChR2-expressing PV-Cre control  
24 group in time spent in, and number of entries to the open arms (Figure 5E, F).



1 These results suggest that PV neurons in the NAc can rescue abnormal risk-  
2 avoidance behavior in *DISC1-N<sup>TM</sup>* mice in the EPM task. Regarding the Chr2-  
3 expressing PV-Cre control group, when given blue light stimulation, time spent  
4 in and the number of entries to the open arms did not differ from the no-light  
5 state (Figure 5E, F). Activation of NAc<sup>PV</sup> neurons in mice with normal *DISC1*  
6 gene expression did not significantly influence behavior. This indicates that in  
7 normal mice, PV neurons may play a role in maintaining an appropriate risk-  
8 avoidance state.

9 Of the neurons in the NAc, 95% are medium spiny GABAergic neurons  
10 (MSNs). We tested whether activation of GABAergic neurons in the NAc could  
11 rescue abnormal risk-avoidance behavior in *DISC1-N<sup>TM</sup>* mice. By crossing  
12 *Vgat-ChR2* mice with *DISC1-N* truncation transgenic mice, we labeled  
13 GABAergic neurons with ChR2 (Fig. S1 A, B). Following tamoxifen injection,  
14 *DISC1/Vgat-ChR2* double transgenic mice spent more time in the open arms  
15 and had more open-arm entries than wild-type littermates (Fig. S1 C, D).  
16 Photostimulation of the NAc at 60 Hz led to a significant reduction in time spent  
17 in, and the number of entries to the open arms in *DISC1/Vgat-ChR2* double  
18 transgenic mice, whereas compared to wild-type littermates, specific activation  
19 of NAc<sup>GABA</sup> by light did not fully rescue the abnormal risk-avoidance behavior in  
20 *DISC1<sup>TM</sup>* mice (Fig. S1 C, D). This result further confirms that NAc<sup>PV</sup> neurons  
21 play an important role in risk-avoidance behavior in *DISC1-N<sup>TM</sup>* mice during the  
22 EPM task.

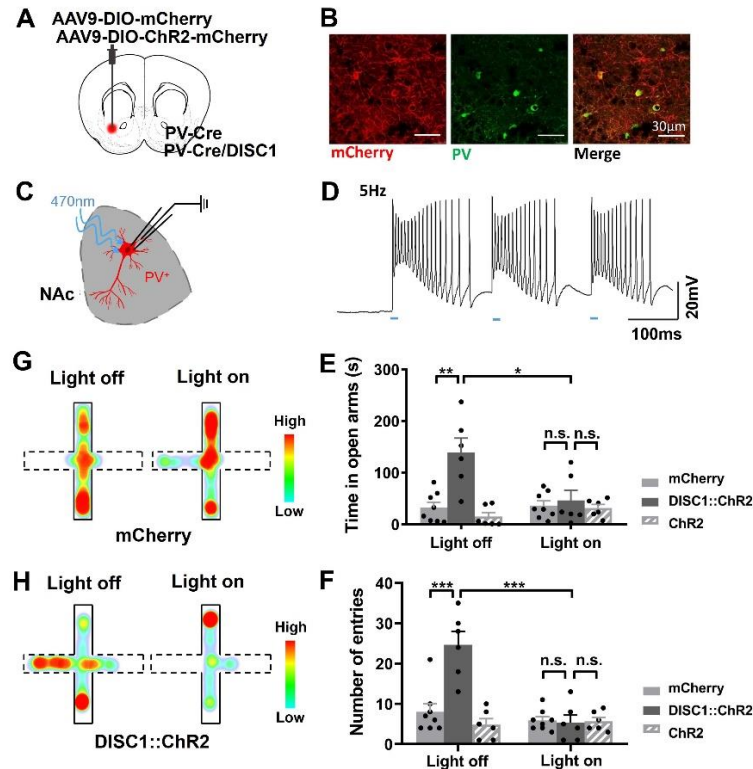

1

2 **Figure 5. Optogenetic stimulation of NAc<sup>PV</sup> neurons rescues risk**

3 **avoidance deficiency in *DISC1-N<sup>TM</sup>* mice.**

4 A. Schematic showing the injection of virus. B. Neurons in the NAc infected

5 with AAV-DIO-ChR2-mCherry (red) co-stained with PV neurons (green). C.

6 Schematic showing patch clamp recording of a PV neuron in an acute brain

7 slice. D. Schematic showing light-evoked action potential of NAc PV neurons.

8 E,F. Time spent in the open arms (E) and number of entries to the open arms

9 (F) before and after blue light (470 nm) stimulation during EPM test (top: \**P*

10 =0.212, \*\**P* =0.0017, bottom: \*\*\**P* =0.0007 (left) and 0.0005 (right); n=8, 6

11 and 6 from left to right). G, H. Representative heatmap illustrating the time

12 spent by a PV-Cre mouse in the open and closed arms in the EPM (G) and a

13 PV-Cre/ *DISC1-N<sup>TM</sup>* mouse (H) before and after blue light (470 nm)

14 stimulation (dotted line represents the open arms).

1

2 **Inhibition of NAc PV neurons mimic the abnormal risk-avoidance**  
3 **behavior observed in *DISC1-N<sup>TM</sup>* mice**

4 We have found that modulation of PV neurons in the NAc can rescue  
5 abnormal risk-avoidance behavior in *DISC1-N<sup>TM</sup>* mice. To assess the  
6 contribution of PV neurons in the NAc to the regulation of *DISC1-N<sup>TM</sup>* abnormal  
7 risk-avoidance behavior, we used designer receptors exclusively activated by a  
8 designer drug (DREADD), to inhibit the activity of NAc PV neurons in mice with  
9 normal DISC1 functions. PV-Cre mice were bilaterally infected with AAV9-DIO-  
10 hM4Di-mCherry (Figure 6A, B). After three weeks of recovery, mice were tested  
11 on elevated zero maze for avoidance behavior without CNO injection. Then,  
12 following a one-week interval, the same group of mice were given CNO and  
13 tested again on the elevated zero maze. We found that mice with hM4Di  
14 expressed in NAc<sup>PV</sup> neurons had similar entry numbers compared to the first  
15 test but spent more time in the open segments (Figure 6C, D). Mean speed was  
16 similar before and after CNO administration (Figure 6E). This result suggests  
17 that this one intervention - inhibition of NAc PV neurons using hM4di - is able  
18 to mimic the abnormal risk-avoidance behavior of *DISC1-N<sup>TM</sup>* mice.

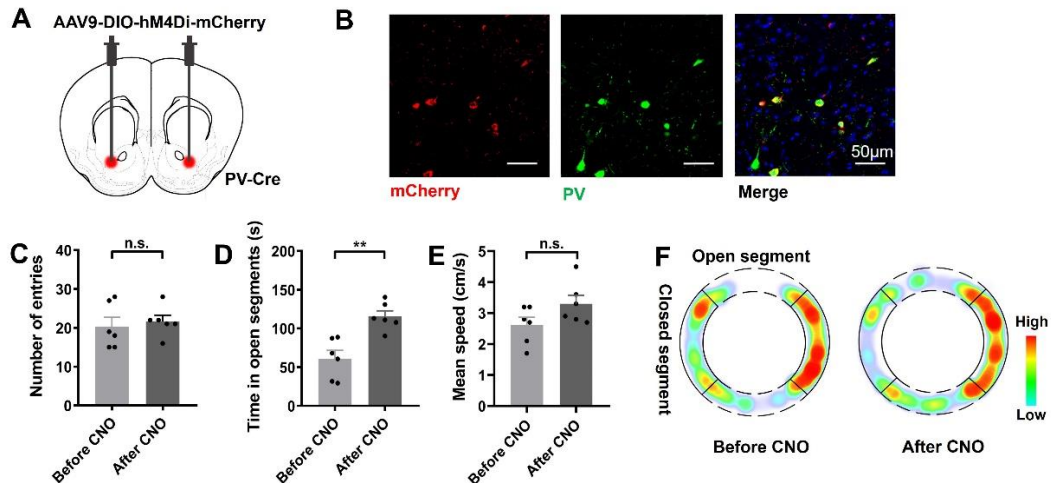

1

2 **Figure 6 Inhibition of PV neurons activity in the NAc mimics *DISC1*-like**  
3 **abnormal risk-avoidance behavior.**

4 A. Schematic showing the injection of virus. B. Neurons in the NAc infected with  
5 AAV-DIO-hM4Di-mCherry (red) co-stained with PV neurons (green). C-E.  
6 Number of entries to the open segments (C), time spent in the open segments  
7 (D) and mean speed (E) before and after CNO administration during EOM test  
8 (\*\* $P = 0.0017$ ;  $n=6$ ). F. Representative heatmap showing time spent in each  
9 location in EOM test before and after CNO administration.

10

## 11 Discussion

12 In this study, we tested risk cognition behavior in *DISC1-N<sup>TM</sup>* mice and found  
13 a risk-avoidance impairment in the EPM test. This test is an approach-  
14 avoidance conflict task where anxious mice tend to avoid the open arms and  
15 favor the closed arms ('safe' zones) more so than non-anxious mice [32, 33].  
16 Rodents have a natural aversion for open and elevated areas, as well as natural  
17 spontaneous exploratory behavior in novel environments. The EPM relies on  
18 the rodents' preference for closed spaces (approach) to open spaces

1 (avoidance) [34] and was directly used to determine the risk avoidance behavior  
2 [35]. Taking into account the impairments in social preference in *DISC1-N<sup>TM</sup>*  
3 mice, we predicted that these mice would spend more time in the open arms  
4 due to impaired normal cognition of the risks compared to their wild-type  
5 littermates. We also use an elevated zero maze to determine whether inhibition  
6 of NAc<sup>PV</sup> neurons can mimic abnormal risk-avoidance behavior seen in *DISC1-*  
7 *N<sup>TM</sup>* mice. The elevated zero maze is a modification of the EPM that has the  
8 advantage of lacking ambiguity in scoring present in the EPM central area.  
9 When NAc<sup>PV</sup> neurons in PV-Cre mice were inhibited, mice spent more time in  
10 the open segments but the number of entries to the open segments was not  
11 different from controls. The increased time spent in the open segments  
12 indicates an impairment in avoiding potential risks. This suggests that NAc<sup>PV</sup>  
13 neurons are indispensable and are able to induce abnormal risk avoidance  
14 behavior of *DISC1-N<sup>TM</sup>* mice.

15 In order to find out which brain region is involved in the risk-avoidance  
16 behavior of *DISC1-N<sup>TM</sup>* mice after EPM tests, we measured neuronal activity in  
17 eight brain regions using c-Fos as an index. We found four brain regions where  
18 c-Fos was expressed significantly more than in WT mice: the NAc, BLA, PVT  
19 and the VTA were increased (in *DISC1-N<sup>TM</sup>* mice, compared with WT mice),  
20 suggesting that these regions may be involved in risk avoidance. In a structural  
21 investigation of mutant *DISC1* mice, it was found that the NAc expressed an  
22 abnormal dopamine type-2 receptor (D2R) profile and medium spiny neurons  
23 had reduced spine density on their dendrites [36]. In mutant *DISC1* mice,  
24 methamphetamine (METH)-induced dopamine (DA) release was significantly  
25 potentiated in NAc [37], and homeostasis of coincident signaling of DA and

1 glutamate was altered within the NAc [38]. Considering these changes in the  
2 NAc due to the mutant *DISC1* gene, we decided upon the NAc as our target  
3 region to investigate the abnormal risk-avoidance behavior of *DISC1-N<sup>TM</sup>* mice.

4 Neurons with the capacity to discharge at high rates are called FS-neurons  
5 [39]. We found that FS-neurons in the NAc had reduced firing rates after  
6 tamoxifen administration and this correlated with a decrease in local theta  
7 power. In the NAc area, FS interneurons modulate principal neurons through  
8 its powerful and sustained feedforward inhibition [40, 41]. PV expressing  
9 interneurons, which constitute 1–2% of NAc neurons, have particular firing  
10 properties and are classified as FS-neurons [40, 42]. Other interneurons in the  
11 NAc that express somatostatin, neuropeptide Y, and neuronal nitric oxide  
12 synthase are classified as persistently low-threshold spiking (PLTS) neurons  
13 [42]. Although many studies have reported FS neurons in the NAc as PV  
14 neurons, PV interneurons in the NAc are not homogeneous. One study  
15 discovered that a portion of NAc FS-neurons also express cannabinoid receptor  
16 1 (CB1) [43, 44]. These NAc<sup>CB1</sup> neurons partly overlap with NAc<sup>PV</sup> neurons  
17 (52%) [43]. Whether CB1-expressing FS-neurons have the same function as  
18 PV-expressing FS-neurons in the NAc, or whether CB1-expressing FS-neurons  
19 can be regarded as a subtype of NAc FS-neurons remains an important  
20 question. Considering that the striatal PV-expressing interneurons recorded  
21 thus far are FS-neurons [45, 46] and the functional properties of FS-neurons  
22 reported thus far have uniformity [44, 47, 48], we think PV can serve as a  
23 reliable marker for FS-neurons in the NAc. Using these guidances, we deduced  
24 that the FS-neurons we recorded in the NAc were PV neurons. We further  
25 explored the function of NAc<sup>PV</sup> neurons by *in vitro* whole cell patch clamp and

1 behavioral tests. We found the current-stimulated firing rate of NAc<sup>PV</sup> neurons  
2 was lower in *DISC1-N<sup>TM</sup>* mice compared with control mice and light-evoked  
3 activation of PV neurons was able to rescue risk-avoidance impairment in  
4 *DISC1-N<sup>TM</sup>* mice. Both of these results are evidence for our deduction. Normally,  
5 NAc<sup>PV</sup> neurons receive excitatory inputs from the same brain areas that project  
6 to NAc<sup>MSN</sup> neurons (95% of total neurons in NAc) and form functional contacts  
7 with NAc<sup>MSN</sup> neurons [47-49]. Whether NAc<sup>PV</sup> neurons function in the same way  
8 in risk-avoidance impairment in *DISC1-N<sup>TM</sup>* mice has not been explored yet.

9 Although many different *DISC1* models have been generated, phenotypes  
10 have not always been consistent [6, 50], and as such, the influence of the  
11 *DISC1* gene on mental disorders remain elusive. As an important hub protein,  
12 *DISC1* can interact with a number of synaptic or cytoskeletal molecules and  
13 modulate many cellular functions, such as synaptic plasticity [51] and  
14 neurogenesis [52, 53]. As such, different mutant models (e.g., *DISC1* mutation  
15 overexpressed model [8]) may influence *DISC1* function to varying degrees  
16 and lead to different phenotypes. In this article, we used N-terminal fragment  
17 *DISC1* transgenic mice. Although we were focused on the cognitive  
18 impairments of the *DISC1-N<sup>TM</sup>* model, we cannot exclude the possibility that  
19 these *DISC1-N<sup>TM</sup>* mice also have abnormal anxiety states on the EPM. Anxiety,  
20 as an emotion, can act as a driver of decision making [54, 55]. More  
21 behavioral experiments are need to further investigate any causal relationship  
22 between risk avoidance impairment and abnormal anxiety states in *DISC1-N<sup>TM</sup>*  
23 mice.

24 In conclusion, we confirmed the cognitive impairment of *DISC1-N<sup>TM</sup>* mice in  
25 recognition of risks and found a lower firing rate in NAc<sup>PV</sup> FS neurons both *in*

1 *vivo* and *in vitro*. Reduced excitability of NAc<sup>PV</sup> neurons may be responsible for  
2 the impairment in risk cognition and optogenetically increasing the activity of  
3 NAc<sup>PV</sup> neurons can rescue risk-avoidance impairment in *DISC1-N<sup>TM</sup>* mice.  
4 These findings add to our understanding the neuronal circuits that relate to  
5 environment risk signals and their related evolutionary significance.

## 6 **Acknowledgements**

7 This work was funded by the National Natural Science Foundation of China  
8 (31671116 J.T., 31761163005 J.T., 31800881 L.W. and 91132306 L.W.), the  
9 International Big Science Program Cultivating Project of CAS  
10 (172644KYS820170004 L.W.), the External Cooperation Program of the  
11 Chinese Academy of Sciences (172644KYSB20160057 J.T.), the Youth  
12 Innovation Promotion Association of the Chinese Academy of Sciences  
13 (2017413 P.W., Y6Y0021004 J.W.), the Guangdong Provincial Key S&T  
14 Program (2018B030336001 J.T.), Shenzhen Government Basic Research  
15 Grants (JCYJ20170413164535041 L.W.), Shenzhen Discipline Construction  
16 Project for Neurobiology DRCSM [2016]1379 (L.W.).

17 We thank Mr. Xu ZB and Mr. Liu BF for their help in transgenic mice  
18 husbandry and phenotyping. We are grateful to Ms. Li NN for the help in virus  
19 packaging.

## 20 **Author contributions**

21 J.T. conceived of this study. X-Y.Z., B-F. W, Q.X., Y. Z., X. Z. and Y.L.  
22 performed experiments. J.T., X-Y. Z., P-F.W., W.H., and J.W. analyzed data.  
23 W-D.L. provided the *DISC1-N<sup>TM</sup>* mice and related materials. L-P. W. provided



1 suggestions and comments on the manuscript. J.T., X-Y.Z. and B-F.W. wrote

2 the manuscript.

3

4

## 1 Reference

- 2 1. Grande, I., et al., *Bipolar disorder*. Lancet, 2016. **387**(10027): p. 1561-1572.
- 3 2. Millar, J.K., et al., *Disruption of two novel genes by a translocation co-segregating with*  
4 *schizophrenia*. Hum Mol Genet, 2000. **9**(9): p. 1415-23.
- 5 3. Hennah, W., et al., *Genes and schizophrenia: beyond schizophrenia: the role of DISC1 in major*  
6 *mental illness*. Schizophr Bull, 2006. **32**(3): p. 409-16.
- 7 4. Hikida, T., et al., *Dominant-negative DISC1 transgenic mice display schizophrenia-associated*  
8 *phenotypes detected by measures translatable to humans*. Proc Natl Acad Sci U S A, 2007.  
9 **104**(36): p. 14501-6.
- 10 5. Shen, S., et al., *Schizophrenia-related neural and behavioral phenotypes in transgenic mice*  
11 *expressing truncated Disc1*. J Neurosci, 2008. **28**(43): p. 10893-904.
- 12 6. Clapcote, S.J., et al., *Behavioral phenotypes of Disc1 missense mutations in mice*. Neuron, 2007.  
13 **54**(3): p. 387-402.
- 14 7. Segal-Gavish, H., et al., *Voluntary exercise improves cognitive deficits in female dominant-*  
15 *negative DISC1 transgenic mouse model of neuropsychiatric disorders*. World J Biol Psychiatry,  
16 2019. **20**(3): p. 243-252.
- 17 8. Zhou, X., et al., *Astrocyte, a Promising Target for Mood Disorder Interventions*. Front Mol  
18 Neurosci, 2019. **12**: p. 136.
- 19 9. Burdick, K.E., et al., *DISC1 and neurocognitive function in schizophrenia*. Neuroreport, 2005.  
20 **16**(12): p. 1399-402.
- 21 10. Sole, B., et al., *Cognitive Impairment in Bipolar Disorder: Treatment and Prevention Strategies*.  
22 Int J Neuropsychopharmacol, 2017. **20**(8): p. 670-680.
- 23 11. Culpepper, L., R.W. Lam, and R.S. McIntyre, *Cognitive Impairment in Patients With Depression:*  
24 *Awareness, Assessment, and Management*. J Clin Psychiatry, 2017. **78**(9): p. 1383-1394.
- 25 12. Colwill, R.M. and R. Creton, *Imaging escape and avoidance behavior in zebrafish larvae*.  
26 Reviews in the Neurosciences, 2011. **22**(1): p. 63-73.
- 27 13. Blomeley, C., C. Garau, and D. Burdakov, *Accumbal D2 cells orchestrate innate risk-avoidance*  
28 *according to orexin signals*. Nat Neurosci, 2018. **21**(1): p. 29-32.
- 29 14. Maner, J.K., et al., *Dispositional anxiety and risk-avoidant decision-making*. Personality and  
30 Individual Differences, 2007. **42**(4): p. 665-675.
- 31 15. Sauer, J.-F., M. Strüber, and M. Bartos, *Impaired fast-spiking interneuron function in a genetic*  
32 *mouse model of depression*. eLife, 2015. **4**: p. e04979.
- 33 16. Shen, S., et al., *Schizophrenia-related neural and behavioral phenotypes in transgenic mice*  
34 *expressing truncated Disc1*. The Journal of neuroscience : the official journal of the Society for  
35 Neuroscience, 2008. **28**(43): p. 10893-10904.
- 36 17. Xiao, Q., et al., *A new GABAergic somatostatin projection from the BNST onto accumbal*  
37 *parvalbumin neurons controls anxiety*. Molecular Psychiatry, 2020.
- 38 18. Bahar, A.S., P.R. Shirvalkar, and M.L. Shapiro, *Memory-guided learning: CA1 and CA3 neuronal*  
39 *ensembles differentially encode the commonalities and differences between situations*. J  
40 Neurosci, 2011. **31**(34): p. 12270-81.
- 41 19. Berke, J.D., et al., *Oscillatory entrainment of striatal neurons in freely moving rats*. Neuron,  
42 2004. **43**(6): p. 883-96.
- 43 20. Bartho, P., et al., *Characterization of neocortical principal cells and interneurons by network*

- 1 *interactions and extracellular features*. J Neurophysiol, 2004. **92**(1): p. 600-8.
- 2 21. Courtin, J., et al., *Prefrontal parvalbumin interneurons shape neuronal activity to drive fear*  
3 *expression*. Nature, 2014. **505**(7481): p. 92-6.
- 4 22. Royer, S., et al., *Control of timing, rate and bursts of hippocampal place cells by dendritic and*  
5 *somatic inhibition*. Nat Neurosci, 2012. **15**(5): p. 769-75.
- 6 23. Cold, C.S.H.P.M. and C.S.H.H.B. Cold, *Observed brain dynamics*. 2007: Oxford University Press.
- 7 24. Kaminitz, A., et al., *Dominant negative DISC1 mutant mice display specific social behaviour*  
8 *deficits and aberration in BDNF and cannabinoid receptor expression*. The World Journal of  
9 Biological Psychiatry, 2014. **15**(1): p. 76-82.
- 10 25. Moy, S.S., et al., *Sociability and preference for social novelty in five inbred strains: an approach*  
11 *to assess autistic-like behavior in mice*. Genes, Brain and Behavior, 2004. **3**(5): p. 287-302.
- 12 26. Floresco, S.B., *The nucleus accumbens: an interface between cognition, emotion, and action*.  
13 Annu Rev Psychol, 2015. **66**: p. 25-52.
- 14 27. Matsumoto, J., et al., *Neuronal responses in the nucleus accumbens shell during sexual*  
15 *behavior in male rats*. J Neurosci, 2012. **32**(5): p. 1672-86.
- 16 28. Klimesch, W., *EEG alpha and theta oscillations reflect cognitive and memory performance: a*  
17 *review and analysis*. Brain research reviews, 1999. **29**(2-3): p. 169-195.
- 18 29. Guo, J., et al., *Abnormal modulation of theta oscillations in children with attention-*  
19 *deficit/hyperactivity disorder*. NeuroImage. Clinical, 2020. **27**: p. 102314-102314.
- 20 30. Zamorano, F., et al., *Lateral Prefrontal Theta Oscillations Reflect Proactive Cognitive Control*  
21 *Impairment in Males With Attention Deficit Hyperactivity Disorder*. Frontiers in systems  
22 neuroscience, 2020. **14**: p. 37-37.
- 23 31. Stark, E., et al., *Inhibition-induced theta resonance in cortical circuits*. Neuron, 2013. **80**(5): p.  
24 1263-1276.
- 25 32. Calhoon, G.G. and K.M. Tye, *Resolving the neural circuits of anxiety*. Nature Neuroscience, 2015.  
26 **18**(10): p. 1394-1404.
- 27 33. Pellow, S., et al., *Validation of open:closed arm entries in an elevated plus-maze as a measure*  
28 *of anxiety in the rat*. J Neurosci Methods, 1985. **14**(3): p. 149-67.
- 29 34. Komada, M., K. Takao, and T. Miyakawa, *Elevated plus maze for mice*. Journal of visualized  
30 experiments : JoVE, 2008(22): p. 1088.
- 31 35. Kim, S.Y., et al., *Diverging neural pathways assemble a behavioural state from separable*  
32 *features in anxiety*. Nature, 2013. **496**(7444): p. 219-23.
- 33 36. Onishi, T., et al., *The Altered Supramolecular Structure of Dopamine D2 Receptors in Disc1-*  
34 *deficient Mice*. Scientific Reports, 2018. **8**(1): p. 1692.
- 35 37. Nakai, T., et al., *Alterations of GABAergic and dopaminergic systems in mutant mice with*  
36 *disruption of exons 2 and 3 of the Disc1 gene*. Neurochemistry International, 2014. **74**: p. 74-  
37 83.
- 38 38. Kim, J., et al., *Quantitative Multi-modal Brain Autoradiography of Glutamatergic,*  
39 *Dopaminergic, Cannabinoid, and Nicotinic Receptors in Mutant Disrupted-In-Schizophrenia-1*  
40 *(DISC1) Mice*. Molecular Imaging and Biology, 2015. **17**(3): p. 355-363.
- 41 39. Baranauskas, G., et al., *Kv3.4 subunits enhance the repolarizing efficiency of Kv3.1 channels in*  
42 *fast-spiking neurons*. Nat Neurosci, 2003. **6**(3): p. 258-66.
- 43 40. Schall, T.A., W.J. Wright, and Y. Dong, *Nucleus accumbens fast-spiking interneurons in*  
44 *motivational and addictive behaviors*. Mol Psychiatry, 2020.

- 1 41. Trouche, S., et al., *A Hippocampus-Accumbens Tripartite Neuronal Motif Guides Appetitive*  
2 *Memory in Space*. Cell, 2019. **176**(6): p. 1393-1406.e16.
- 3 42. Tepper, J., et al., *Heterogeneity and Diversity of Striatal GABAergic Interneurons*. Frontiers in  
4 Neuroanatomy, 2010. **4**(150).
- 5 43. Winters, B.D., et al., *Cannabinoid receptor 1-expressing neurons in the nucleus accumbens*.  
6 Proceedings of the national academy of sciences, 2012. **109**(40): p. E2717-E2725.
- 7 44. Wright, W.J., O.M. Schlüter, and Y. Dong, *A feedforward inhibitory circuit mediated by CB1-*  
8 *expressing fast-spiking interneurons in the nucleus accumbens*. Neuropsychopharmacology,  
9 2017. **42**(5): p. 1146-1156.
- 10 45. Lee, K., et al., *Parvalbumin Interneurons Modulate Striatal Output and Enhance Performance*  
11 *during Associative Learning*. Neuron, 2017. **93**(6): p. 1451-1463.e4.
- 12 46. Koós, T. and J.M. Tepper, *Inhibitory control of neostriatal projection neurons by GABAergic*  
13 *interneurons*. Nature Neuroscience, 1999. **2**(5): p. 467-472.
- 14 47. Yu, J., et al., *Nucleus accumbens feedforward inhibition circuit promotes cocaine self-*  
15 *administration*. Proceedings of the National Academy of Sciences, 2017. **114**(41): p. E8750-  
16 E8759.
- 17 48. Scudder, S.L., et al., *Hippocampal-evoked feedforward inhibition in the nucleus accumbens*.  
18 Journal of Neuroscience, 2018. **38**(42): p. 9091-9104.
- 19 49. Qi, J., et al., *VTA glutamatergic inputs to nucleus accumbens drive aversion by acting on*  
20 *GABAergic interneurons*. Nature neuroscience, 2016. **19**(5): p. 725-733.
- 21 50. Eachus, H., et al., *Disrupted-in-Schizophrenia-1 is essential for normal hypothalamic-pituitary-*  
22 *interrenal (HPI) axis function*. Hum Mol Genet, 2017. **26**(11): p. 1992-2005.
- 23 51. Tropea, D., et al., *Mechanisms underlying the role of DISC1 in synaptic plasticity*. J Physiol, 2018.  
24 **596**(14): p. 2747-2771.
- 25 52. Ye, F., et al., *DISC1 Regulates Neurogenesis via Modulating Kinetochore Attachment of*  
26 *Ndel1/Nde1 during Mitosis*. Neuron, 2017. **96**(5): p. 1041-1054.e5.
- 27 53. Terrillon, C.E., et al., *DISC1 in Astrocytes Influences Adult Neurogenesis and Hippocampus-*  
28 *Dependent Behaviors in Mice*. Neuropsychopharmacology, 2017. **42**(11): p. 2242-2251.
- 29 54. Hartley, C.A. and E.A. Phelps, *Anxiety and decision-making*. Biol Psychiatry, 2012. **72**(2): p. 113-  
30 8.
- 31 55. Lerner, J.S., et al., *Emotion and decision making*. Annu Rev Psychol, 2015. **66**: p. 799-823.
- 32

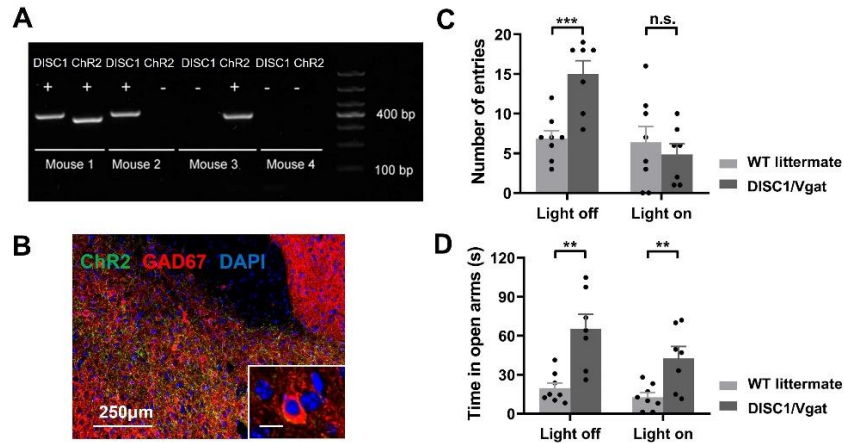

1

2 **Suppl. Figure 1 Optogenetic stimulation of NAc<sup>GABA</sup> neurons did not fully**  
3 **rescue risk-avoidance impairment in *DISC1-N<sup>TM</sup>* mice.**

4 A. Sample gel showing the successful generation of DISC1/Vgat-ChR2 double  
5 transgenic mice. B. Representative confocal image showing targeted ChR2  
6 expression (green) co-stained with GABAergic neurons (red) in the NAc in  
7 these double transgenic mice. Scale bars= 250 µm, 10 µm (inset). C, D.  
8 Number of entries (C) and time spent in the open arms (D) before and after blue  
9 light (470 nm) stimulation during the EPM test (top: \*\*\*P =0.0009, bottom: \*\*P  
10 =0.0014 (left) and 0.0066 (right); n=8 left, n=7 right).

11
